# Supplementary material for: Pentafluorophenyl end-capped bithiophene imide (BTI) based n-type semiconductors for organic thin-film transistors
Source: Royal Society of Chemistry journal article supplement (doi:10.1039/d5tc04019a), 2026-01-01
Supplement: d5tc04019a1.pdf [file d5tc04019a1.pdf]

## Supporting Information

# Pentafluorophenyl End-Capped Bithiophene Imide (BTI) based n-Type Semiconductors for Organic Thin-Film Transistors.

*Deebakkrishnan Ganesan,<sup>1,#</sup> Hwijoong Kim,<sup>2,#</sup> Yu-Qi Li,<sup>1</sup> Jeongjae Noh,<sup>2</sup> Wen-Yu Chen,<sup>1</sup> Shao-Huan Hong,<sup>3</sup> Cheng-Liang Liu,<sup>3</sup> Ming-Chou Chen,<sup>1\*</sup> Choongik Kim<sup>2\*</sup>*

<sup>1</sup>Department of Chemistry and Taiwan Hydrogen Cluster-Hydrogen Energy Research Centre, National Central University, Taoyuan 32001, Taiwan; e-mail: [mcchen@ncu.edu.tw](mailto:mcchen@ncu.edu.tw)

<sup>2</sup>Department of Chemical and Biomolecular Engineering, Sogang University, 35 Baekbom-ro, Mapo-gu, Seoul 04107, Republic of Korea; e-mail: [choongik@sogang.ac.kr](mailto:choongik@sogang.ac.kr)

<sup>3</sup>Department of Materials Science and Engineering, National Taiwan University, Taiwan

# These authors contributed equally to this work.

\*Corresponding authors. E-mail: [mcchen@ncu.edu.tw](mailto:mcchen@ncu.edu.tw); [choongik@sogang.ac.kr](mailto:choongik@sogang.ac.kr)

**KEYWORDS:** Bithiophene imide; pentafluorophenyl; solution-processing; organic semiconductors; organic thin-film transistor

## Experimental Section

### 1. Synthesis

#### 1. 1. Synthesis step of DFP-BTI-b8 (1)

Compound **3a** (0.1g, 1eq) was dissolved in toluene under a nitrogen atmosphere. To the solution, trimethyl(perfluorophenyl)stannane (0.195g, 3eq) and bis(triphenylphosphine)palladium(II) dichloride (13 mg, 0.1eq) were added sequentially. Then the reaction was heated to reflux for two days. Upon completion, the mixture was cooled to room temperature, and the solvent was removed under reduced pressure. The crude was purified by column chromatography (hexanes/ethyl acetate = 90:10 vol/vol). The title compound was obtained as a yellow solid. Yield (0.11 g, 82%). <sup>1</sup>H NMR (300 MHz, CDCl<sub>3</sub>): δ 8.18 (s, 2H), 4.26–4.24 (m, 2H), 1.86–1.83 (m, 1H), 1.36–1.25 (m, 8H), 0.92–0.86 (m, 6H). <sup>13</sup>C NMR (75 MHz, CDCl<sub>3</sub>): spectrum could not be obtained completely due to the poor solubility of the compound. <sup>19</sup>F NMR (282 MHz, CDCl<sub>3</sub>): δ -138, -152, -160. MS (HR-FAB, m/z) calcd. for C<sub>30</sub>H<sub>19</sub>F<sub>10</sub>NO<sub>2</sub>S<sub>2</sub>: 679.0698 (M<sup>+</sup>). Found: 679.0692.

#### 1. 2. Synthesis step of DFP-BTI-b16 (2)

Synthesized according to **DFP-BTI-b8 (1)** compound procedure using compound **3b** (0.1g, 1eq), trimethyl(perfluorophenyl)stannane (0.160g, 3eq) and bis(triphenylphosphine)palladium(II) dichloride (11 mg, 0.1eq). The title compound was obtained as a yellow solid. Yield (0.1g, 78%). <sup>1</sup>H NMR (300 MHz, CDCl<sub>3</sub>): δ 8.18 (s, 2H), 4.26–4.24 (d, *J* = 6 Hz, 2H), 1.94 (m, 1H), 1.24 (m, 24H), 0.85–0.83 (m, 6H). <sup>13</sup>C NMR (75 MHz, CDCl<sub>3</sub>): δ 161.63, 145.07, 143.41, 141.82, 140.10, 139.02, 137.26, 136.01, 133.84, 126.08, 108.06, 49.78, 36.48, 31.88, 31.80, 31.71, 30.87,

30.06, 29.73, 29.54, 29.30, 26.41, 22.63, 14.03.  $^{19}\text{F}$  NMR (282 MHz,  $\text{CDCl}_3$ ):  $\delta$  -138, -152, -160.

MS (HR-FAB,  $m/z$ ) calcd. for  $\text{C}_{38}\text{H}_{35}\text{F}_{10}\text{NO}_2\text{S}_2$ : 791.1950 ( $\text{M}^+$ ). Found: 791.1947.

**Table S1.** Summary of crystal structure data for **DFP-BTI-b8 (1)**.

|                                               |                                                                |
|-----------------------------------------------|----------------------------------------------------------------|
| Identification code                           | 240955LT_auto                                                  |
| Empirical formula                             | $\text{C}_{30}\text{H}_{19}\text{F}_{10}\text{NO}_2\text{S}_2$ |
| Formula weight                                | 679.58                                                         |
| Temperature/K                                 | 100.00(10)                                                     |
| Crystal system                                | monoclinic                                                     |
| Space group                                   | $\text{P2}_1/\text{c}$                                         |
| $a/\text{\AA}$                                | 21.9217(9)                                                     |
| $b/\text{\AA}$                                | 5.26044(18)                                                    |
| $c/\text{\AA}$                                | 23.2688(7)                                                     |
| $\alpha/^\circ$                               | 90                                                             |
| $\beta/^\circ$                                | 94.557(3)                                                      |
| $\gamma/^\circ$                               | 90                                                             |
| Volume/ $\text{\AA}^3$                        | 2674.83(16)                                                    |
| $Z$                                           | 4                                                              |
| $\rho_{\text{calc}}/\text{g/cm}^3$            | 1.688                                                          |
| $\mu/\text{mm}^{-1}$                          | 2.753                                                          |
| $F(000)$                                      | 1376.0                                                         |
| Crystal size/ $\text{mm}^3$                   | $0.28 \times 0.01 \times 0.01$                                 |
| Radiation                                     | $\text{Cu K}\alpha$ ( $\lambda = 1.54184$ )                    |
| $2\Theta$ range for data collection/ $^\circ$ | 7.622 to 146.246                                               |
| Index ranges                                  | $-26 \leq h \leq 27, -5 \leq k \leq 6, -27 \leq l \leq 28$     |
| Reflections collected                         | 18812                                                          |
| Independent reflections                       | 5203 [ $R_{\text{int}} = 0.0551, R_{\text{sigma}} = 0.0674$ ]  |
| Data/restraints/parameters                    | 5203/266/474                                                   |
| Goodness-of-fit on $F^2$                      | 1.024                                                          |
| Final $R$ indexes [ $I \geq 2\sigma(I)$ ]     | $R_1 = 0.0573, wR_2 = 0.1260$                                  |
| Final $R$ indexes [all data]                  | $R_1 = 0.1018, wR_2 = 0.1487$                                  |
| Largest diff. peak/hole / $\text{e \AA}^{-3}$ | 0.31/-0.52                                                     |

Crystallographic data (excluding structure factors) for the structure(s) reported in this paper have been deposited with the Cambridge Crystallographic Data Centre as supplementary publication no. **CCDC 2499871**.

**Table S2.** Summary of crystal structure data for **DFP-BTI-b16 (2)**.

|                                             |                                                                                |
|---------------------------------------------|--------------------------------------------------------------------------------|
| Identification code                         | 2508004lt_auto                                                                 |
| Empirical formula                           | C <sub>38</sub> H <sub>35</sub> F <sub>10</sub> NO <sub>2</sub> S <sub>2</sub> |
| Formula weight                              | 791.79                                                                         |
| Temperature/K                               | 100.00(15)                                                                     |
| Crystal system                              | monoclinic                                                                     |
| Space group                                 | P2 <sub>1</sub> /c                                                             |
| a/Å                                         | 28.1941(13)                                                                    |
| b/Å                                         | 5.2713(3)                                                                      |
| c/Å                                         | 24.0617(11)                                                                    |
| α/°                                         | 90                                                                             |
| β/°                                         | 102.298(5)                                                                     |
| γ/°                                         | 90                                                                             |
| Volume/Å <sup>3</sup>                       | 3494.0(3)                                                                      |
| Z                                           | 4                                                                              |
| ρ <sub>calc</sub> /g/cm <sup>3</sup>        | 1.505                                                                          |
| μ/mm <sup>-1</sup>                          | 2.191                                                                          |
| F(000)                                      | 1632.0                                                                         |
| Crystal size/mm <sup>3</sup>                | 0.32 × 0.03 × 0.01                                                             |
| Radiation                                   | Cu Kα (λ = 1.54184)                                                            |
| 2θ range for data collection/°              | 6.418 to 146.482                                                               |
| Index ranges                                | -33 ≤ h ≤ 34, -4 ≤ k ≤ 6, -28 ≤ l ≤ 29                                         |
| Reflections collected                       | 24992                                                                          |
| Independent reflections                     | 6766 [R <sub>int</sub> = 0.0558, R <sub>sigma</sub> = 0.0403]                  |
| Data/restraints/parameters                  | 6766/442/616                                                                   |
| Goodness-of-fit on F <sup>2</sup>           | 1.060                                                                          |
| Final R indexes [I >= 2σ (I)]               | R <sub>1</sub> = 0.0768, wR <sub>2</sub> = 0.2262                              |
| Final R indexes [all data]                  | R <sub>1</sub> = 0.1047, wR <sub>2</sub> = 0.2492                              |
| Largest diff. peak/hole / e Å <sup>-3</sup> | 0.70/-0.39                                                                     |

Crystallographic data (excluding structure factors) for the structure(s) reported in this paper have been deposited with the Cambridge Crystallographic Data Centre as supplementary publication no. **CCDC 2499872**.

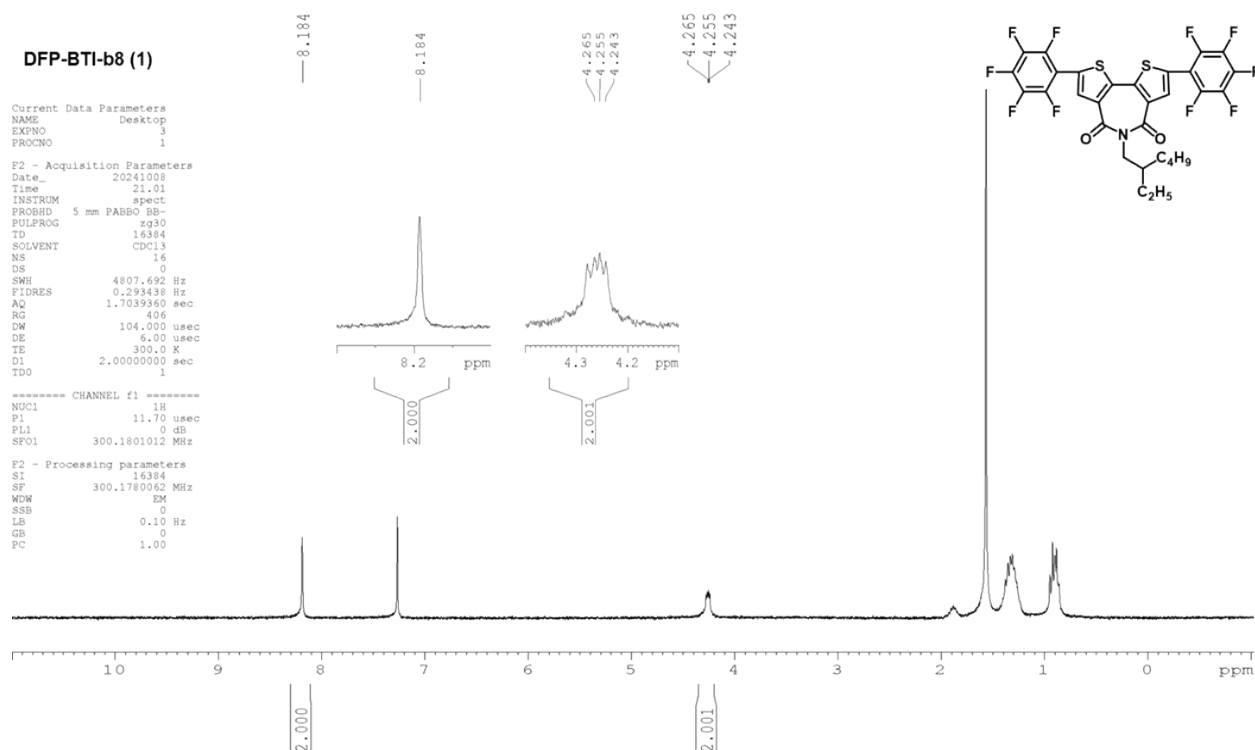

**Fig. S1.**  $^1\text{H}$  NMR spectrum of **DFP-BTI-b8 (1)** in  $\text{CDCl}_3$ .

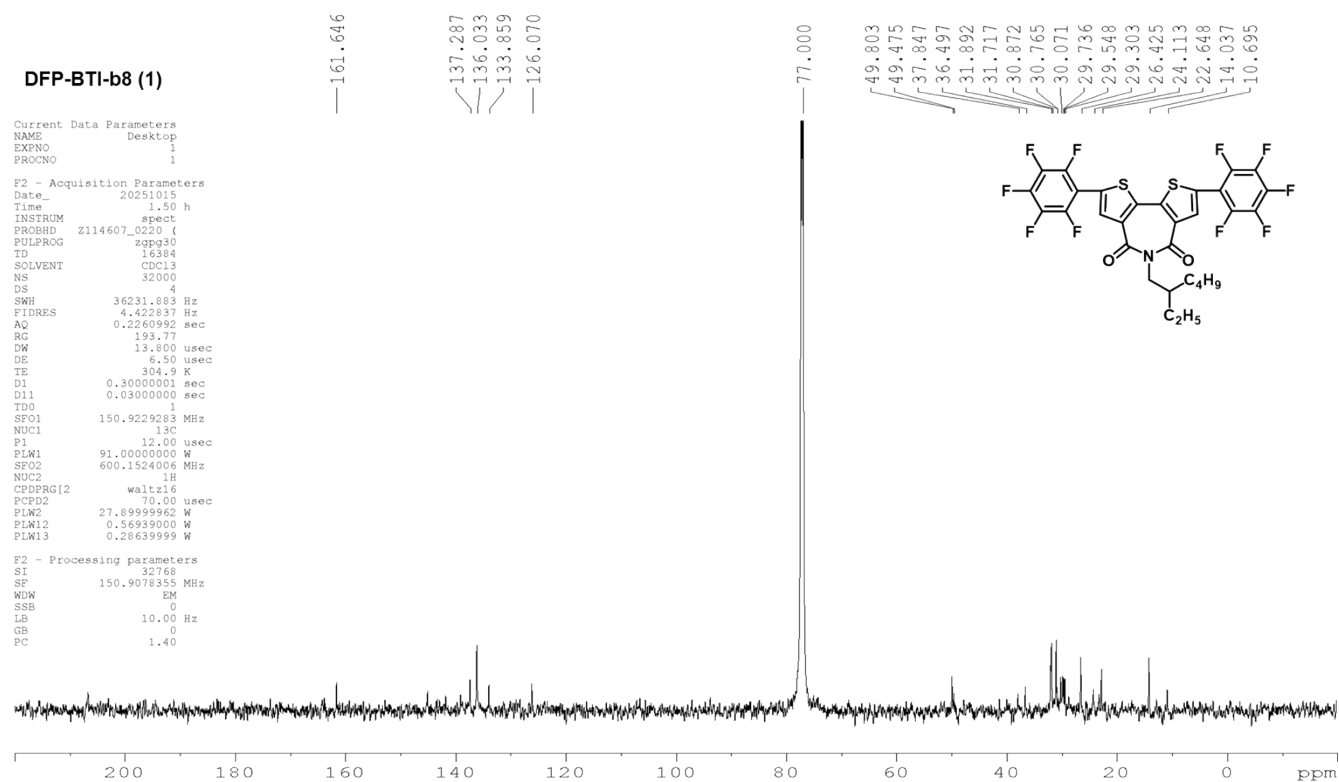

**Fig. S2.** <sup>13</sup>C NMR spectrum of **DFP-BTI-b8 (1)** in CDCl<sub>3</sub>.

**DFP-BTI-b8 (1)**

Current Data Parameters  
NAME Desktop  
EXPNO 2  
PROCNO 1

F2 - Acquisition Parameters  
Date\_ 20241008  
Time 20.57  
INSTRUM spect  
PROBHD 5 mm PABBO BB-  
PULPROG zgpg30  
TD 131072  
SOLVENT CDCl3  
NS 16  
DS 0  
SWH 59523.809 Hz  
FIDRES 0.454131 Hz  
AQ 1.1010048 sec  
RG 2050  
DW 8.400 usec  
DE 6.00 usec  
TE 300.0 K  
D1 1.50000000 sec  
d11 0.03000000 sec  
d12 0.00002000 sec  
TD0 1

===== CHANNEL f1 =====  
NUC1 19F  
P1 8.95 usec  
PL1 -4.00 dB  
SFO1 282.4212754 MHz

===== CHANNEL f2 =====  
CPDPRG2 waltz16  
NUC2 1H  
PCPD2 90.00 usec  
PL12 17.70 dB  
PL2 0 dB  
SFO2 300.1792007 MHz

F2 - Processing parameters  
SI 65536  
SF 282.4495200 MHz  
WDW EM  
SSB 0  
LB 0.30 Hz  
GB 0  
PC 1.00

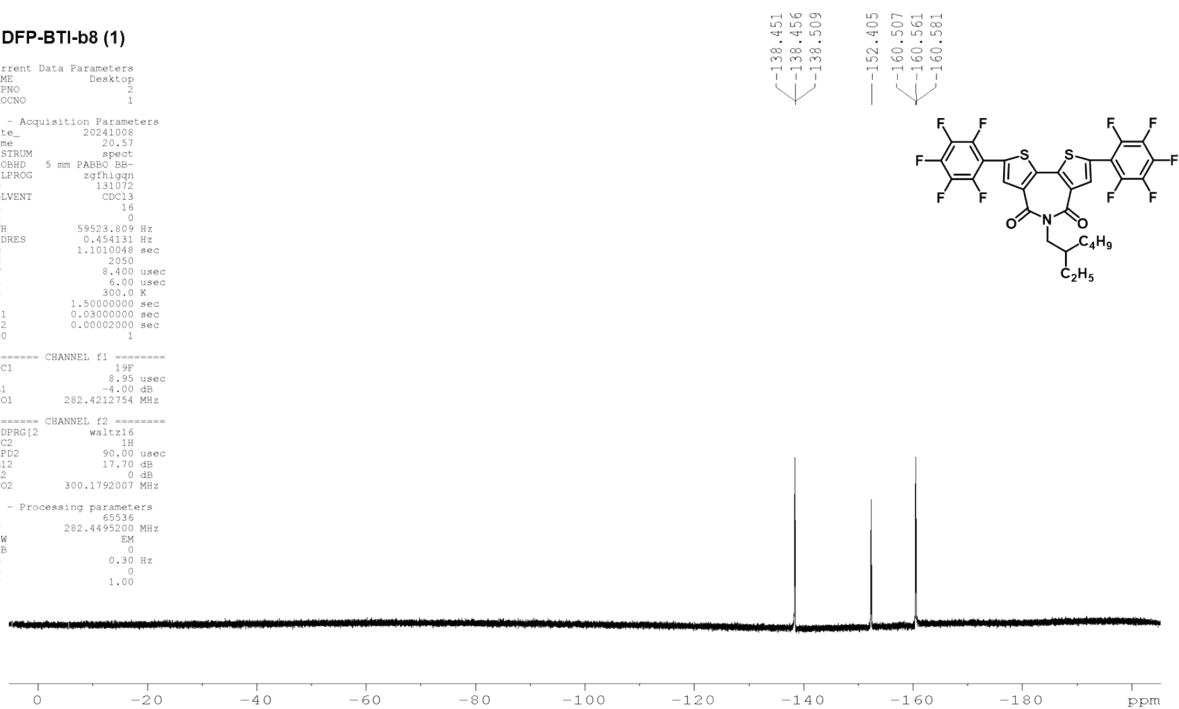

**Fig. S3.**  $^{19}\text{F}$  NMR spectrum of **DFP-BTI-b8 (1)** in  $\text{CDCl}_3$ .

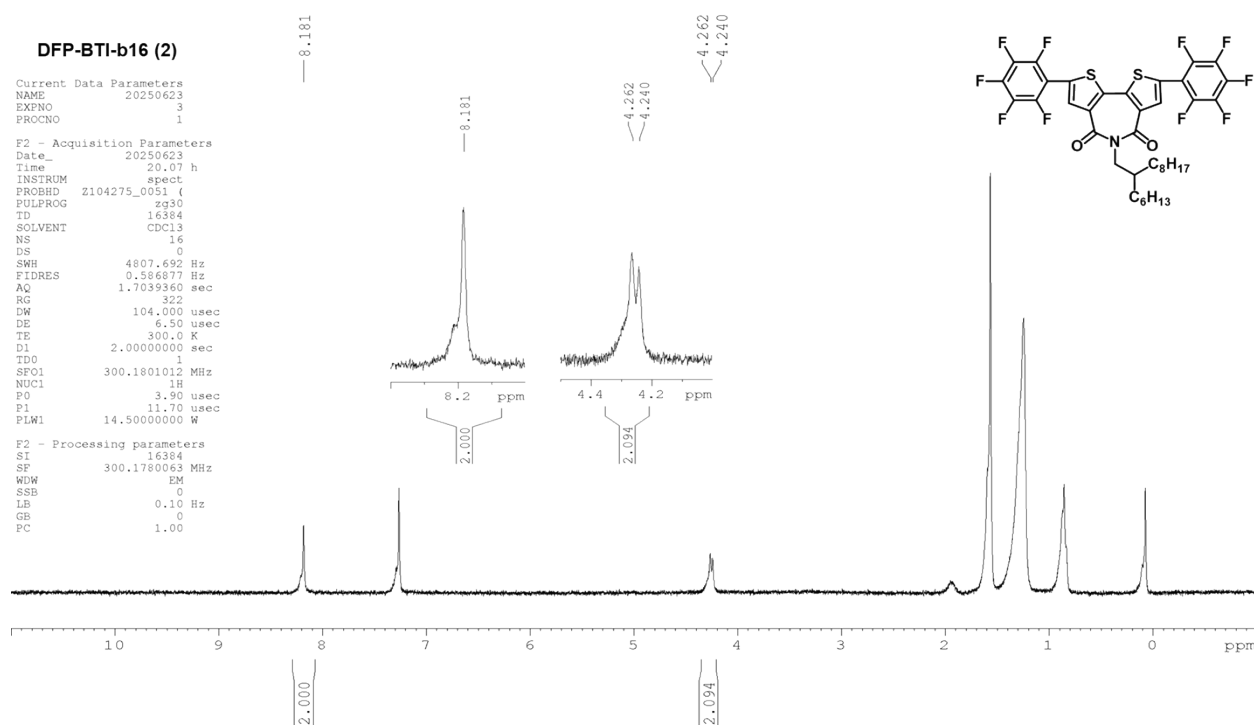

**Fig. S4.** <sup>1</sup>H NMR spectrum of **DFP-BTI-b16 (2)** in CDCl<sub>3</sub>.



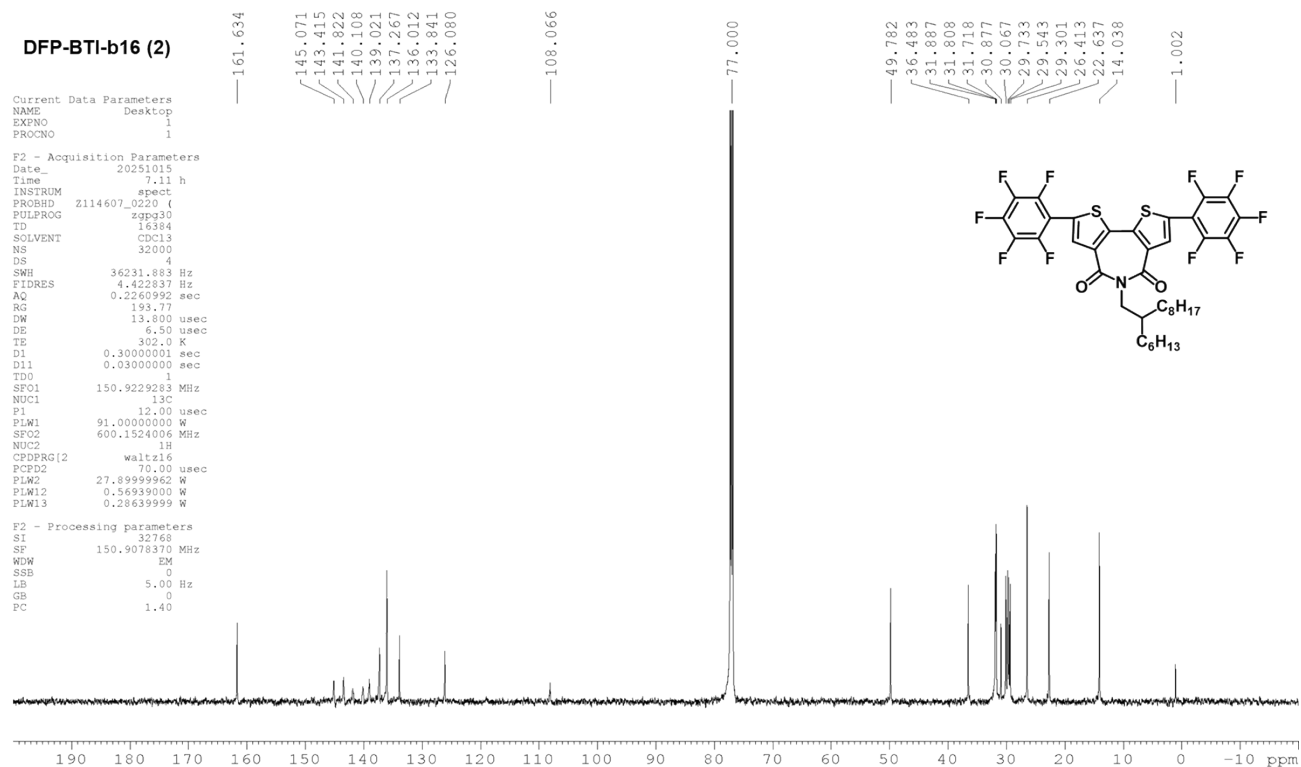

**Fig. S5.**  $^{13}\text{C}$  NMR spectrum of **DFP-BTI-b16 (2)** in  $\text{CDCl}_3$ .

**DFP-BTI-b16 (2)**

Current Data Parameters  
NAME 20250623  
EXPNO 4  
PROCNO 1

F2 - Acquisition Parameters  
Date\_ 20250623  
Time 20.13 h  
INSTRUM spect  
PROBHD Z104275.0051 ( )  
PULPROG zgpg30  
TD 131072  
SOLVENT CDCl3  
NS 16  
DS 0  
SWH 59523.809 Hz  
FIDRES 0.908261 Hz  
AQ 1.1010048 sec  
RG 2050  
DW 8.400 usec  
DE 6.50 usec  
TE 300.0 K  
D1 1.50000000 sec  
D11 0.03000000 sec  
D12 0.00002000 sec  
TD0 1  
SFO1 282.4212757 MHz  
NUC1 19F  
P1 8.95 usec  
PLW1 26.39999962 W  
SFO2 300.1792007 MHz  
NUC2 1H  
CPDPRG2 waltz16  
PCPD2 90.00 usec  
PLW2 14.50000000 W  
PLW12 0.24505000 W

F2 - Processing parameters  
SI 65536  
SF 282.4495203 MHz  
WDW EM  
SSB 0  
LB 0.30 Hz  
GB 0  
PC 1.00

-138.438  
-138.455  
-138.509  
-152.319  
-152.394  
-152.469  
-160.474  
-160.492  
-160.544  
-160.565  
-160.618

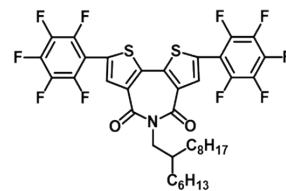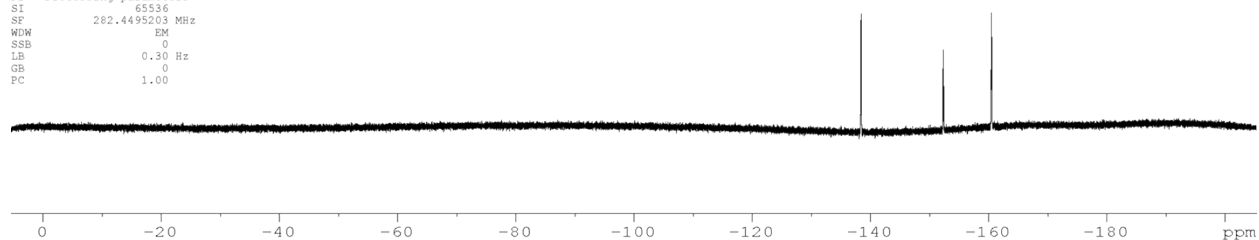

**Fig. S6.**  $^{19}\text{F}$  NMR spectrum of **DFP-BTI-b16 (2)** in  $\text{CDCl}_3$ .

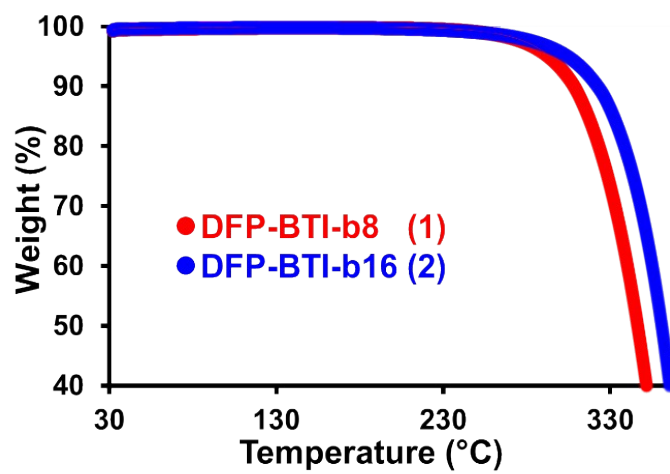

Fig. S7. TGA thermogram of compounds (1-2).

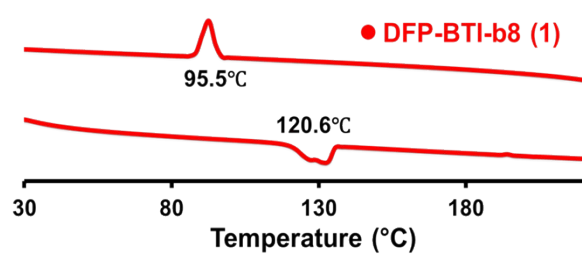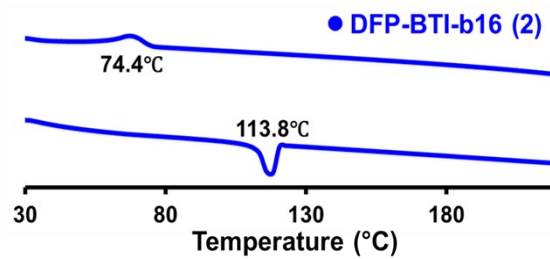

**Fig. S8.** DSC thermogram of compounds (1-2).

| Atom | U <sup>11</sup> | U <sup>22</sup> | U <sup>33</sup> | U <sup>12</sup> | U <sup>13</sup> | U <sup>23</sup> |
|------|-----------------|-----------------|-----------------|-----------------|-----------------|-----------------|
| C1   | 0.021           | 0.021           | 0.021           | 0.000           | 0.000           | 0.000           |
| C2   | 0.021           | 0.021           | 0.021           | 0.000           | 0.000           | 0.000           |
| C3   | 0.021           | 0.021           | 0.021           | 0.000           | 0.000           | 0.000           |
| C4   | 0.021           | 0.021           | 0.021           | 0.000           | 0.000           | 0.000           |
| C5   | 0.021           | 0.021           | 0.021           | 0.000           | 0.000           | 0.000           |
| C6   | 0.021           | 0.021           | 0.021           | 0.000           | 0.000           | 0.000           |
| C7   | 0.021           | 0.021           | 0.021           | 0.000           | 0.000           | 0.000           |
| C8   | 0.021           | 0.021           | 0.021           | 0.000           | 0.000           | 0.000           |
| C9   | 0.021           | 0.021           | 0.021           | 0.000           | 0.000           | 0.000           |
| C10  | 0.021           | 0.021           | 0.021           | 0.000           | 0.000           | 0.000           |
| C11  | 0.021           | 0.021           | 0.021           | 0.000           | 0.000           | 0.000           |
| C12  | 0.021           | 0.021           | 0.021           | 0.000           | 0.000           | 0.000           |
| C13  | 0.021           | 0.021           | 0.021           | 0.000           | 0.000           | 0.000           |
| C14  | 0.021           | 0.021           | 0.021           | 0.000           | 0.000           | 0.000           |
| C15  | 0.021           | 0.021           | 0.021           | 0.000           | 0.000           | 0.000           |
| C16  | 0.021           | 0.021           | 0.021           | 0.000           | 0.000           | 0.000           |
| C17  | 0.021           | 0.021           | 0.021           | 0.000           | 0.000           | 0.000           |
| C18  | 0.021           | 0.021           | 0.021           | 0.000           | 0.000           | 0.000           |
| C19  | 0.021           | 0.021           | 0.021           | 0.000           | 0.000           | 0.000           |
| C20  | 0.021           | 0.021           | 0.021           | 0.000           | 0.000           | 0.000           |
| C21  | 0.021           | 0.021           | 0.021           | 0.000           | 0.000           | 0.000           |
| C22  | 0.021           | 0.021           | 0.021           | 0.000           | 0.000           | 0.000           |
| C23  | 0.021           | 0.021           | 0.021           | 0.000           | 0.000           | 0.000           |
| C24  | 0.021           | 0.021           | 0.021           | 0.000           | 0.000           | 0.000           |
| C25  | 0.021           | 0.021           | 0.021           | 0.000           | 0.000           | 0.000           |
| C26  | 0.021           | 0.021           | 0.021           | 0.000           | 0.000           | 0.000           |
| C27  | 0.021           | 0.021           | 0.021           | 0.000           | 0.000           | 0.000           |
| C28  | 0.021           | 0.021           | 0.021           | 0.000           | 0.000           | 0.000           |
| C29  | 0.021           | 0.021           | 0.021           | 0.000           | 0.000           | 0.000           |
| C30  | 0.021           | 0.021           | 0.021           | 0.000           | 0.000           | 0.000           |
| C31  | 0.021           | 0.021           | 0.021           | 0.000           | 0.000           | 0.000           |
| C32  | 0.021           | 0.021           | 0.021           | 0.000           | 0.000           | 0.000           |
| C33  | 0.021           | 0.021           | 0.021           | 0.000           | 0.000           | 0.000           |
| C34  | 0.021           | 0.021           | 0.021           | 0.000           | 0.000           | 0.000           |
| C35  | 0.021           | 0.021           | 0.021           | 0.000           | 0.000           | 0.000           |
| C36  | 0.021           | 0.021           | 0.021           | 0.000           | 0.000           | 0.000           |
| C37  | 0.021           | 0.021           | 0.021           | 0.000           | 0.000           | 0.000           |
| C38  | 0.021           | 0.021           | 0.021           | 0.000           | 0.000           | 0.000           |
| C39  | 0.021           | 0.021           | 0.021           | 0.000           | 0.000           | 0.000           |
| C40  | 0.021           | 0.021           | 0.021           | 0.000           | 0.000           | 0.000           |
| C41  | 0.021           | 0.021           | 0.021           | 0.000           | 0.000           | 0.000           |
| C42  | 0.021           | 0.021           | 0.021           | 0.000           | 0.000           | 0.000           |
| C43  | 0.021           | 0.021           | 0.021           | 0.000           | 0.000           | 0.000           |
| C44  | 0.021           | 0.021           | 0.021           | 0.000           | 0.000           | 0.000           |
| C45  | 0.021           | 0.021           | 0.021           | 0.000           | 0.000           | 0.000           |
| F1   | 0.021           | 0.021           | 0.021           | 0.000           | 0.000           | 0.000           |
| F2   | 0.021           | 0.021           | 0.021           | 0.000           | 0.000           | 0.000           |
| F3   | 0.021           | 0.021           | 0.021           | 0.000           | 0.000           | 0.000           |

**Fig. S9.** Perspective ORTEP drawing of the molecular structures of (a) **DFP-BTI-b8 (1)** and (b) **DFP-BTI-b16 (2)**.

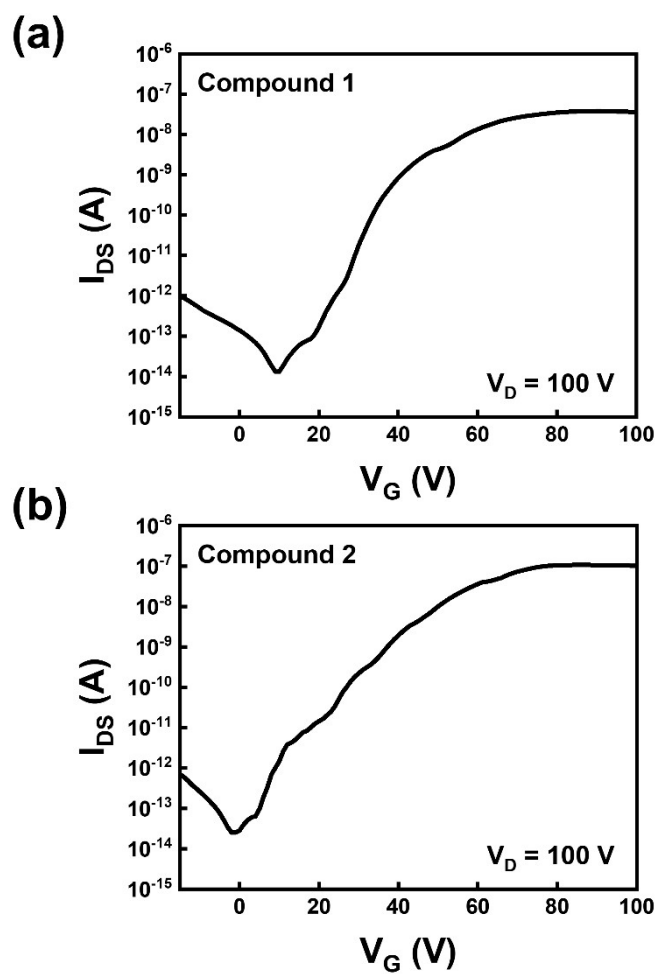

**Fig. S10.** Representative transfer curves of the OTFT devices using thin-films of (a) compound **1** and (b) compound **2** fabricated via spin-coating.

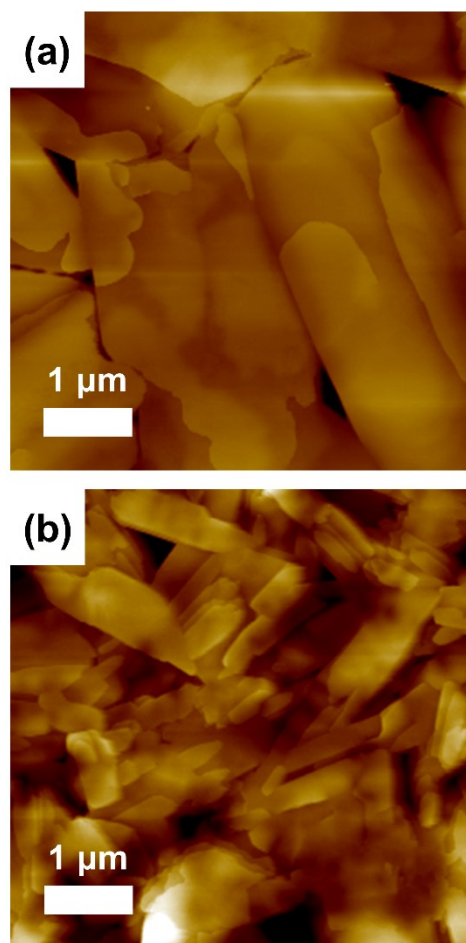

**Fig. S11.** Surface topographic images of thin-films of (a) compound **1** and (b) compound **2** fabricated via spin-coating obtained by atomic force spectroscopy (AFM).
